# Supplementary material for: Heterointerface regulation of covalent organic framework-anchored graphene via a solvent-free strategy for high-performance supercapacitor and hybrid capacitive deionization electrodes
Source: Royal Society of Chemistry journal article supplement (doi:10.1039/d4mh00161c), 2024-01-01
Supplement: d4mh00161c1.pdf [file d4mh00161c1.pdf]

## Supporting Information

### **Heterointerface regulation of covalent organic framework-anchored graphene *via* a solvent-free strategy for high-performance supercapacitor and hybrid capacitive deionization electrodes**

Liming Xu,<sup>a</sup> Yong Liu,<sup>b\*</sup> Xiaoyang Xuan<sup>c\*</sup>, Xingtao Xu,<sup>d</sup> Yuquan Li,<sup>e</sup> Ting Lu,<sup>a</sup> Likun Pan <sup>a\*</sup>

<sup>a</sup> *Shanghai Key Laboratory of Magnetic Resonance, School of Physics and Electronic Science, East China Normal University, Shanghai 200241, China*

<sup>b</sup> *School of Materials Science and Engineering, Qingdao University of Science and Technology, Qingdao, Shandong 266042, China*

<sup>c</sup> *College of Chemistry and Chemical Engineering, Taishan University, Taian, Shandong 271000, China*

<sup>d</sup> *Marine Science and Technology College, Zhejiang Ocean University, Zhoushan, Zhejiang 316022, China*

<sup>e</sup> *College of Environmental Science and Engineering, Yangzhou University, Yangzhou, Jiangsu 225127, China*

*\*Corresponding authors*

*Email: [lkpan@phy.ecnu.edu.cn](mailto:lkpan@phy.ecnu.edu.cn) (Likun Pan); [yong.liu@qust.edu.cn](mailto:yong.liu@qust.edu.cn) (Yong Liu); [xyxuan@tsu.edu.cn](mailto:xyxuan@tsu.edu.cn) (Xiaoyang Xuan)*

## Materials

Benzene-1,2,4,5-tetraamine tetrahydrochloride (BA, 97%) was purchased from Bide Pharmatech Ltd. Hexaketocyclohexane octahydrate (HC, 98%) was purchased from Meryer (Shanghai) Chemical Technology Co., Ltd. P-toluenesulfonic acid monohydrate (PTSA, 98%), polyvinylidene fluoride (PVDF,  $\geq 99.5\%$ ), 1-methyl-2-pyrrolidone (NMP,  $\geq 99.5\%$ ), and sodium chloride (NaCl,  $\geq 99.5\%$ ) purchased from Sinopharm Chemical Reagent Co., Ltd (Shanghai, China). AC (4~7  $\mu\text{m}$ ) was purchased from Kuraray (Shanghai) Co., Ltd. All the chemicals were used without further purification.

## Structural characterizations

The microstructure of the samples was observed by scanning electron microscopy (SEM, Hitachi S-4800) and field emission transmission electron microscopy (TEM, JEM 2010 JEOL). The crystal structure was examined by X-ray diffraction (XRD, Panalytical PRO PW3040/60) with Cu K $\alpha$  ( $\lambda=1.54056$  Å). The chemical structure and elemental composition were observed by Fourier Transform Infrared Spectrometer (FT-IR, Nicolet iS-50) and powder X-ray photoelectron spectroscopy (XPS, Thermo ESCALAB 250XI). Specific surface area and pore size distribution were calculated by the Brunauer-Emmett-Teller (BET, Autosorb iQ) method, and the density functional theory pore model of Barret-Joyner-Halenda was used to analyze the specific surface area and pore size distribution.

## Preparation of working electrode

80 wt.% active material, 10 wt.% Super P (conductive agent) and 10 wt.% polyvinylidene fluoride (binder) were mixed in 1-methyl-2-pyrrolidone to form a homogeneous slurry. Then, the slurry was uniformly cast on graphite substrates (4 cm<sup>2</sup> for the three-electrode system and 32 cm<sup>2</sup> for the CDI cell). Finally, the working electrode was dried at 80 °C under vacuum conditions overnight. For the electrochemical and desalination tests, the mass loading of active material on the working electrode was about 4 mg and 60 mg, respectively.

## Electrochemical characterizations

The electrochemical performance of the working electrode was measured by cyclic voltammetry (CV), galvanostatic charge-discharge (GCD), and electrochemical impedance spectroscopy (EIS) in an open environment using a CHI660E electrochemical analyzer (Shanghai, China) with 1 M NaCl solution as electrolyte. In the three-electrode system, Ag/AgCl and a platinum mesh were used as the reference and counter electrodes, respectively.

## Electrochemical calculation

For the three-electrode system, the specific capacitance ( $C_{S1}$ , F g<sup>-1</sup>) of the material was calculated from CV curves according to the following formula:<sup>1</sup>

$$C_{S1} = \frac{\int_{E_1}^{E_2} i(E)d(E)}{2mv(E_2 - E_1)} \quad (S1)$$

where  $E_1$  and  $E_2$  are the cutoff potentials in CV,  $i(E)$  is the instantaneous current,  $i(E)d(E)$  is the total voltammetric charge obtained by integration of the positive and negative sweeps in the CV,  $v$  is the scan rate, and  $m$  is the mass of the individual sample. The specific capacitance ( $C_{S2}$ , F g<sup>-1</sup>) was calculated from the GCD curves according to the following equation:<sup>2</sup>

$$C_{S2} = \frac{I * \Delta t}{m * \Delta V} \quad (S2)$$

where  $I$ ,  $\Delta t$ ,  $m$ , and  $\Delta V$ , refer to the current (A), discharge time (s), mass of active material (g), and potential window (V), respectively.

For the two-electrode system, the specific capacitance ( $C_{S3}$ , F g<sup>-1</sup>) was calculated by the following formula:<sup>3</sup>

$$C_{S3} = \frac{I * \Delta t}{m * \Delta V} \quad (S3)$$

where  $I$ ,  $\Delta V$ ,  $\Delta t$ , and  $m$  are the discharge current (A), the voltage window (V), the discharge time (s), and the total mass (g) of the active material of two electrodes, respectively. The energy density ( $E$ , Wh kg<sup>-1</sup>) and power density ( $P$ , W kg<sup>-1</sup>) were calculated by the following two equations:<sup>4</sup>

$$E = \frac{C_{S3} * \Delta V^2}{2 * 3.6} \quad (S4)$$

$$P = \frac{3600 * E}{\Delta t} \quad (S5)$$

where  $C_{S3}$ ,  $\Delta t$ , and  $\Delta V$  are specific capacitances (F g<sup>-1</sup>), discharge time (s), and voltage window (V).

## Desalination tests

All desalination experiments were carried out in a batch-mode HCDI system with continuously

circulating the NaCl solution through the HCDI unit by using a peristaltic pump (volume: 70 mL, flow rate: 100 mL min<sup>-1</sup>, temperature: room temperature). The concentration of the pump effluent was recorded in real-time by an ion conductivity meter (DDSJ-308A, Precision & Scientific Instrument). The working electrode of HCDI consists of a BAHC/BAHCGO cathode and an AC anode separated by a spacer and anion/cation-exchange membrane. The desalination experiments of NaCl solutions with different initial concentrations (100, 200, 300, 500, 1000 mg L<sup>-1</sup>) were carried out at ±1.6 V, while different current densities (50, 100, 150, 200, 250 mA g<sup>-1</sup>) were employed for the tests in 500 mg L<sup>-1</sup> NaCl solution. Our previous work described the relationship between NaCl solution conductivity and concentration.<sup>5</sup>

### Desalination calculation

The desalination capacity (SAC, mg g<sup>-1</sup>), mean desalination rate (MSAR, mg g<sup>-1</sup> min<sup>-1</sup>), and charge efficiency (Λ) were defined as follows:<sup>6,7</sup>

$$\text{SAC} = \frac{(C_0 - C_e) * V}{m} \quad (\text{S6})$$

$$\text{MSAR} = \frac{\text{SAC}}{t} \quad (\text{S7})$$

$$\Lambda = \frac{(C_0 - C_e) * V * F}{1000 * M * Q} * 100\% \quad (\text{S8})$$

where  $C_0$  and  $C_e$  are the initial and final NaCl concentrations (mg L<sup>-1</sup>),  $V$  is the volume of NaCl solution (L),  $m$  is the mass of the active materials (g),  $t$  (s) is the charge time,  $F$  is the Faraday constant (96,485 C mol<sup>-1</sup>),  $M$  (58.44 g mol<sup>-1</sup>) is the relative molar mass of NaCl, and  $Q$  (charge, C) is the total charge.

### Complex capacitance calculation

The complex capacitance ( $C(\omega)$ , F) was defined as follows:<sup>6,7</sup>

$$\text{SAC} = \frac{(C_0 - C_e) * V}{m} \quad (\text{S6})$$

$$\text{MSAR} = \frac{\text{SAC}}{t} \quad (\text{S7})$$

where  $C_0$  and  $C_e$  are the initial and final NaCl concentrations ( $\text{mg L}^{-1}$ ),  $V$  is the volume of NaCl solution (L),  $m$  is the mass of the active materials (g),  $t$  (s) is the charge time,  $F$  is the Faraday constant ( $96,485 \text{ C mol}^{-1}$ ),  $M$  ( $58.44 \text{ g mol}^{-1}$ ) is the relative molar mass of NaCl, and  $Q$  (charge, C) is the total charge.

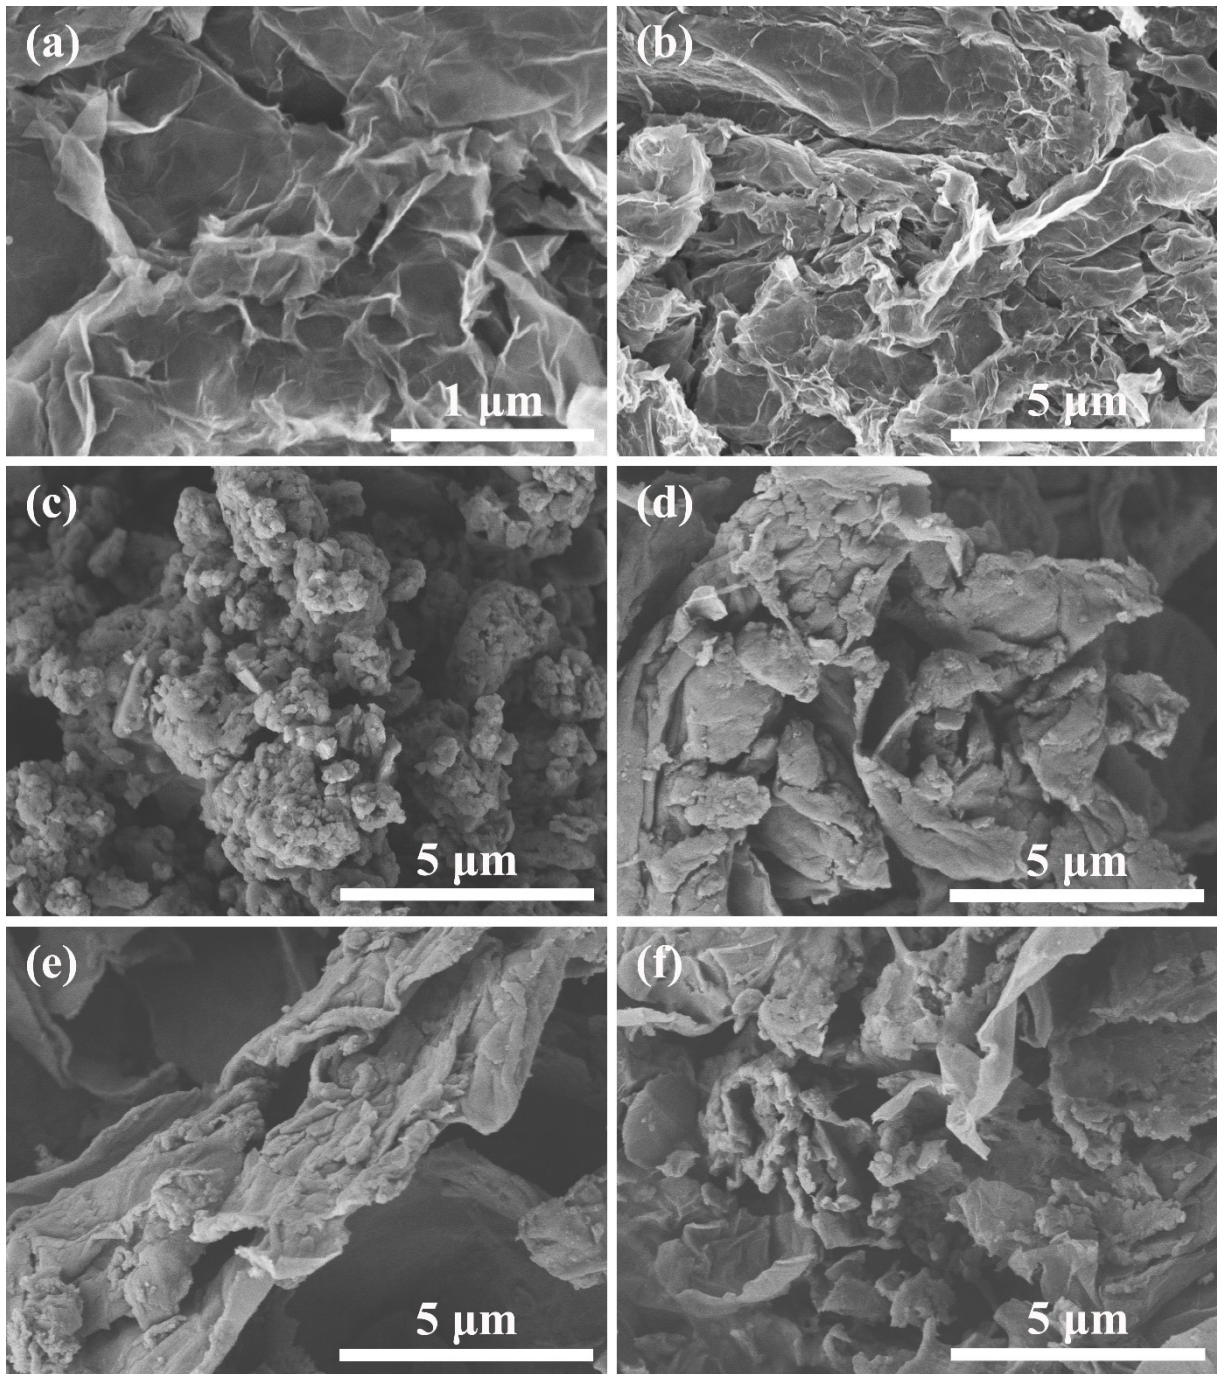

**Fig. S1.** SEM images of (a,b) rGO, (c) BAHC, (d) BAHCGO-50, (e) BAHCGO-75, and (f) BAHCGO-100.

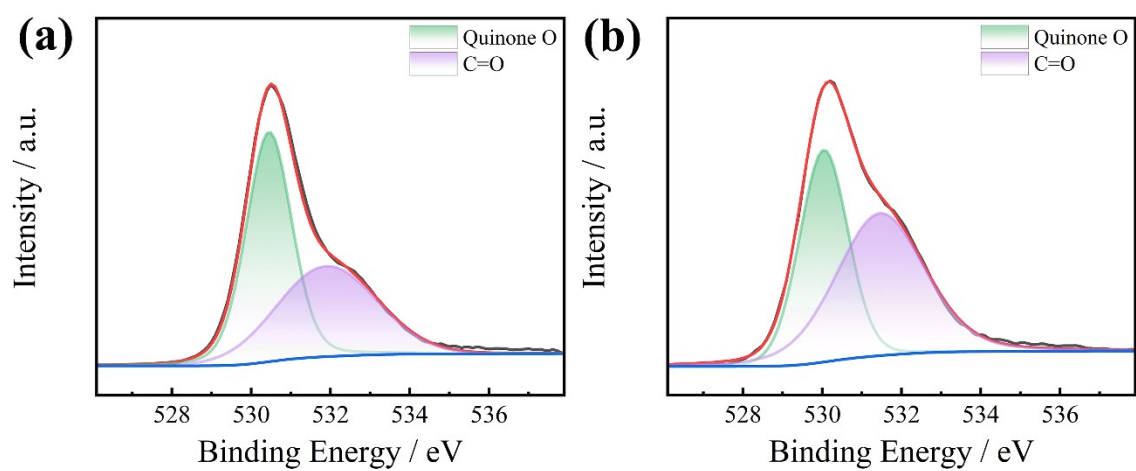

**Fig. S2.** High-resolution XPS O 1s spectra of (a) BAHC and (b) BAHCGO-75.

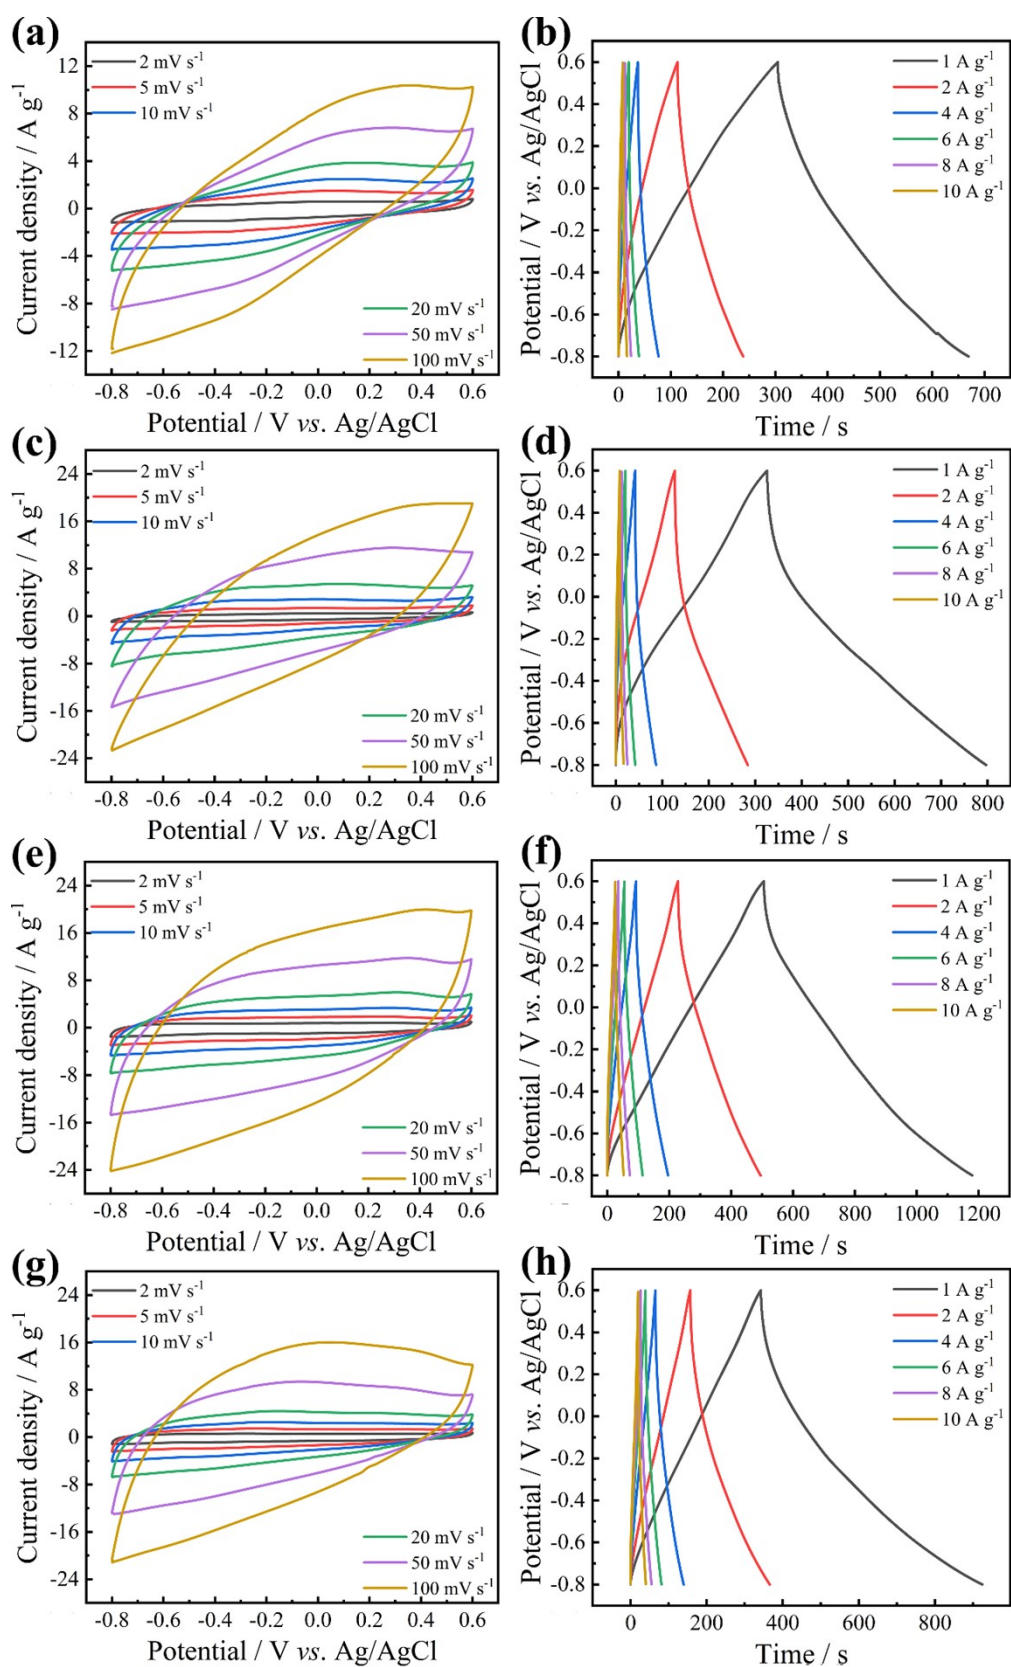

**Fig. S3.** Electrochemical performances of (a, b) BAHC, (c, d) BAHCGO-50, (e, f) BAHCGO-75, and (g, h) BAHCGO-100 under the three-electrode system.

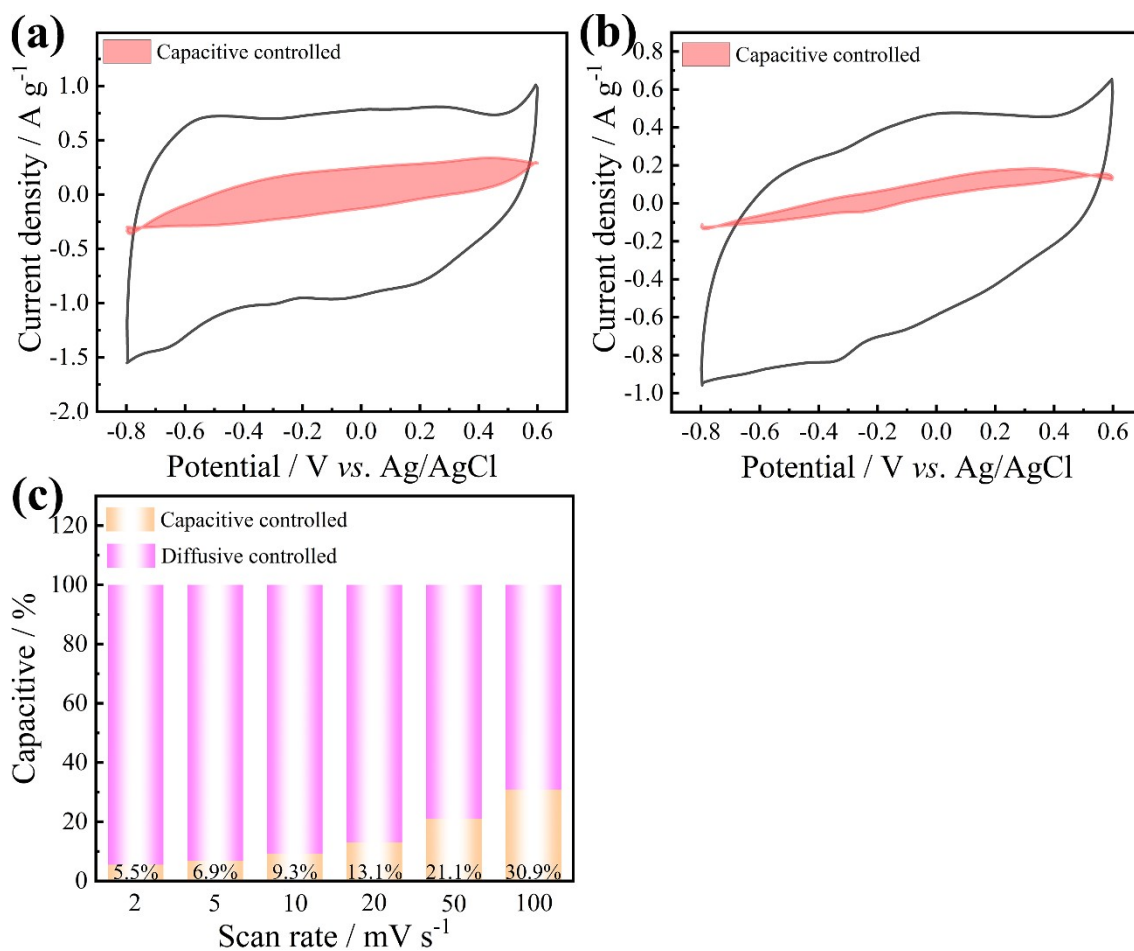

**Fig. S4.** CV curves with the capacitive contribution of (a) BAHCGO-75 and (b) BAHC at 2 mV s<sup>-1</sup>. Percentages of capacitive and diffusion contributions of (c) BAHC.

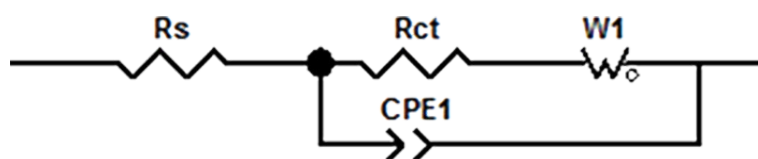

**Fig. S5.** The fitting equivalent circuit diagram of the EIS test.



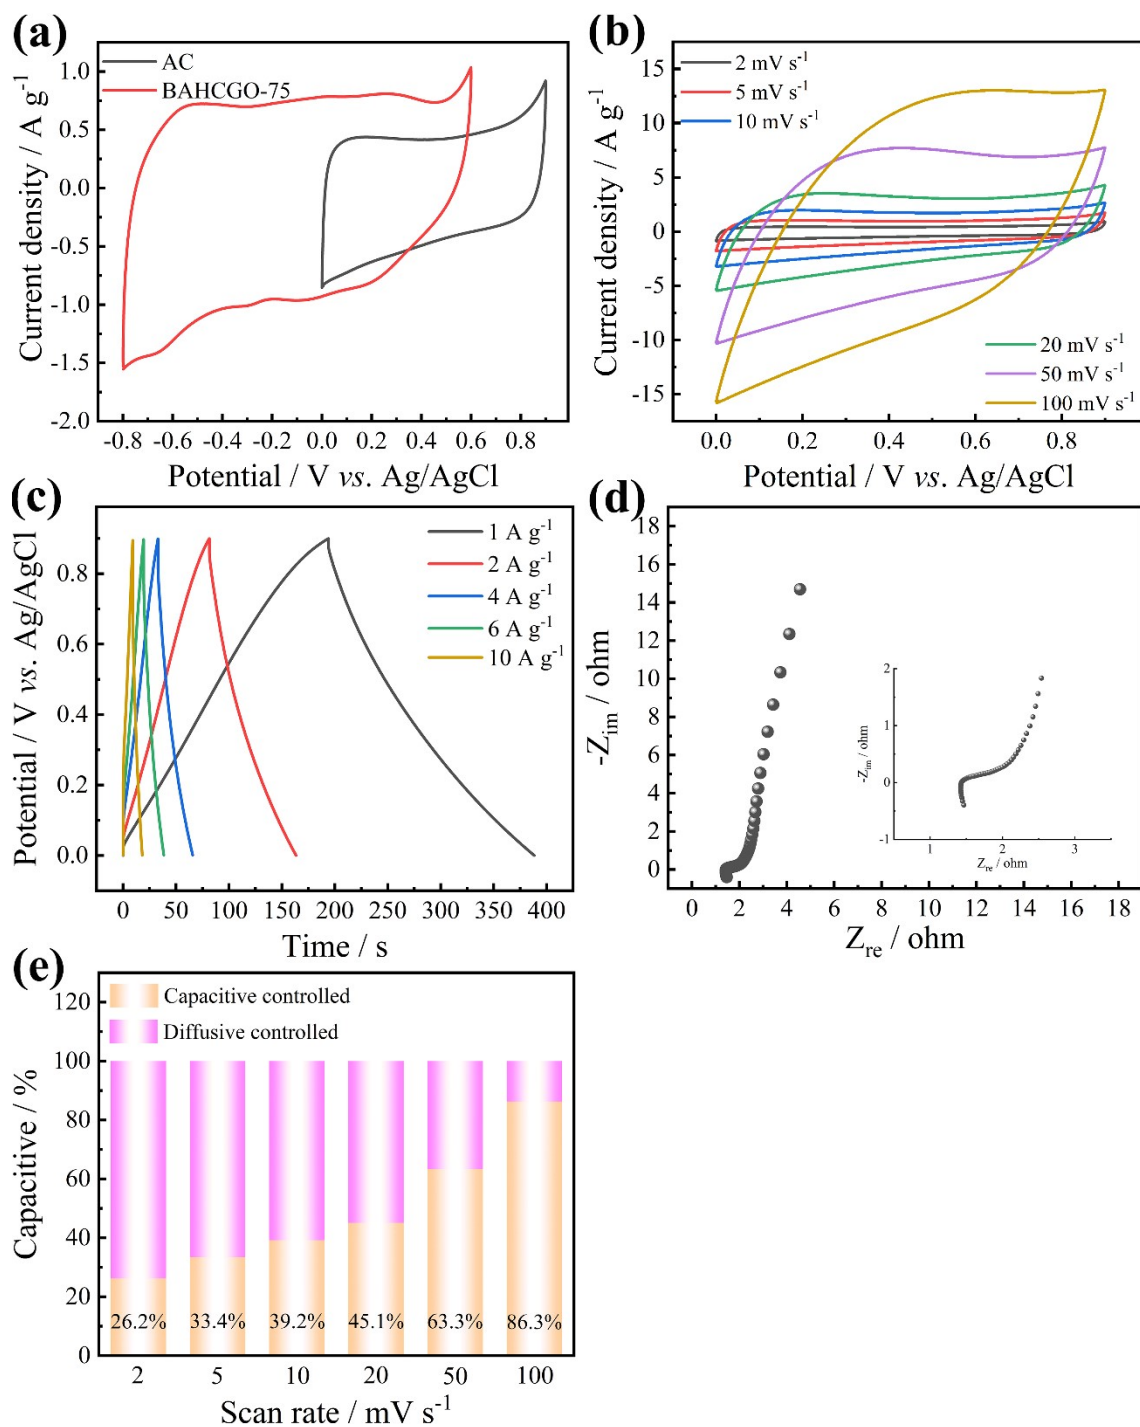

**Fig. S6.** (a) CV curves of AC and BAHCGO-75 at a scan rate of 2 mV s<sup>-1</sup>. (b) CV curves at 2-100 mV s<sup>-1</sup>, (c) GCD curve at 1-10 A g<sup>-1</sup>, (d) Nyquist plots (Inset shows the magnified plot in the high-frequency region), and (e) percentages of capacitive and diffusion contributions of AC.

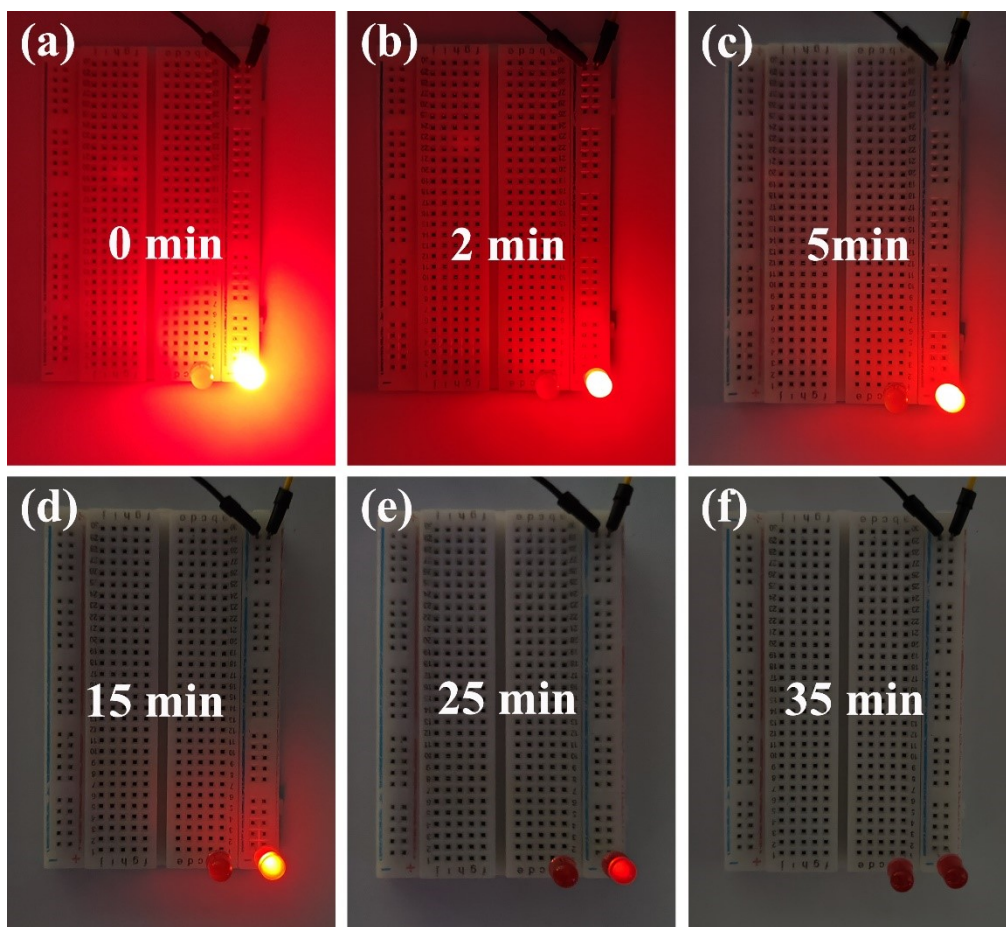

**Fig. S7.** Photographs presenting two BAHCGO-75//AC ASCs connected in series to successfully light up the red LDE lamp.

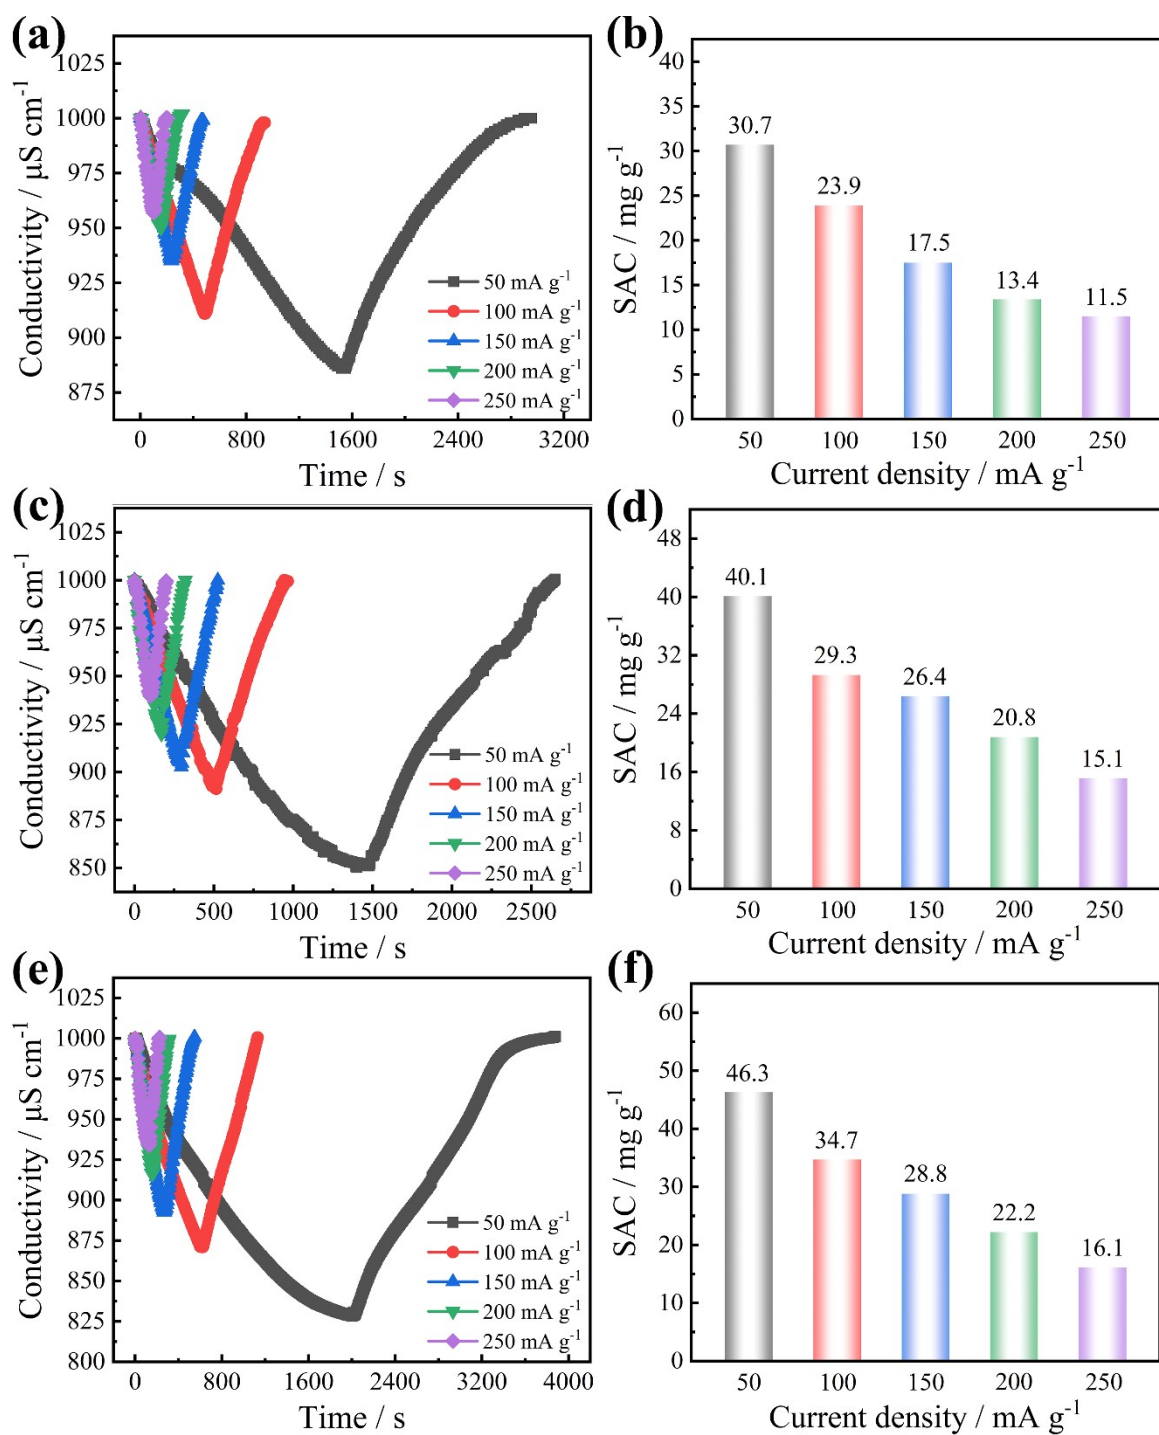

**Fig. S8.** Conductivity curves and SACs at different current densities of (a, b) BAHC, (c, d) BAHCGO-50, and (e, f) BAHCGO-100.

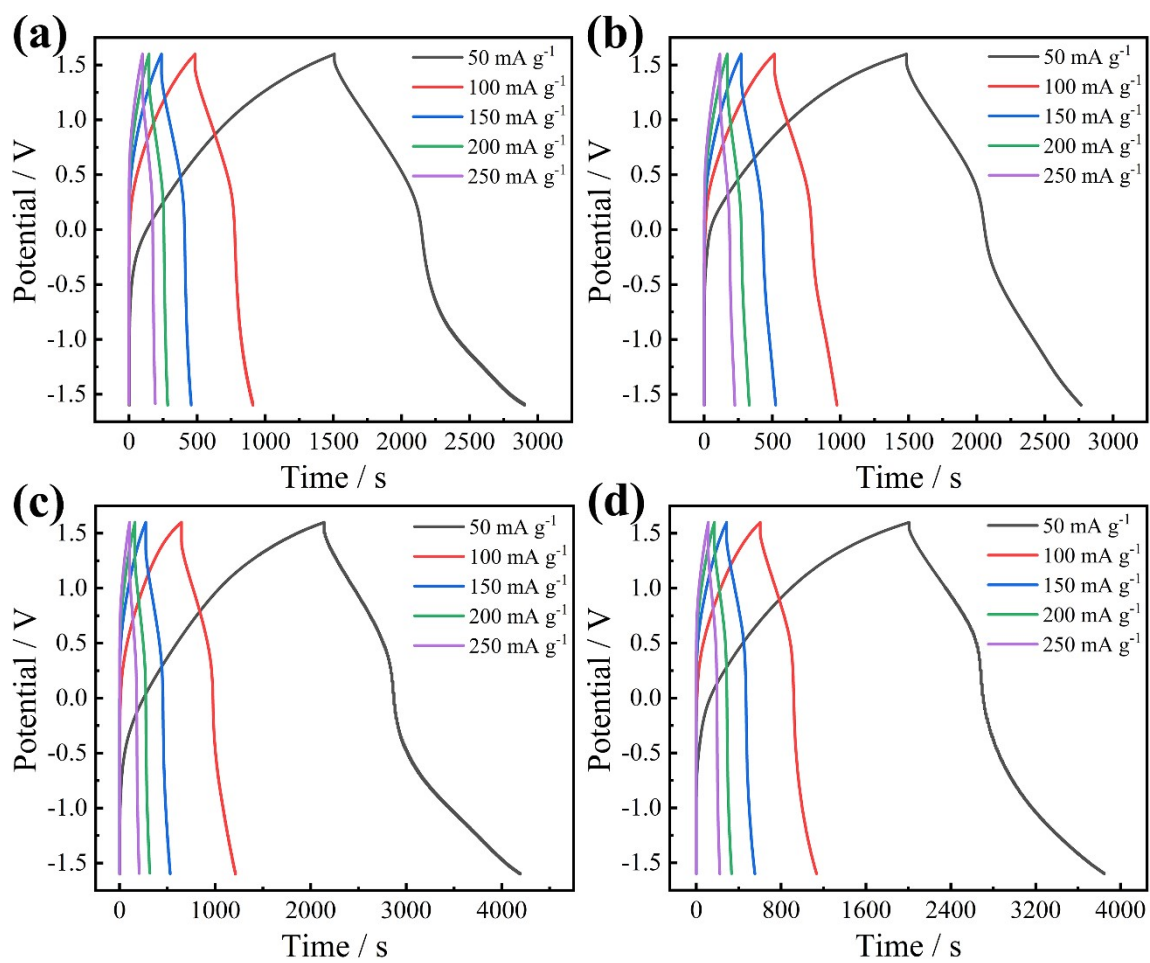

**Fig. S9.** Voltage response curves of (a) BAHC, (b) BAHCGO-50, (c) BAHCGO-75, and (d) BAHCGO-100 HCDI at various current densities.

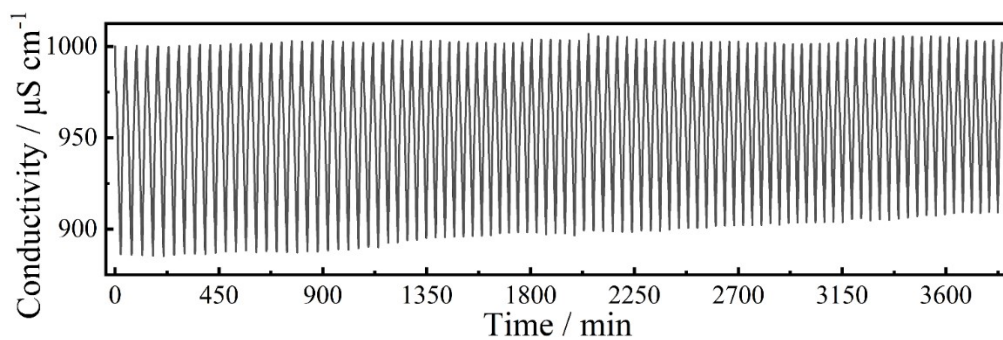

**Fig. S10.** Cycling performance of BAHC.

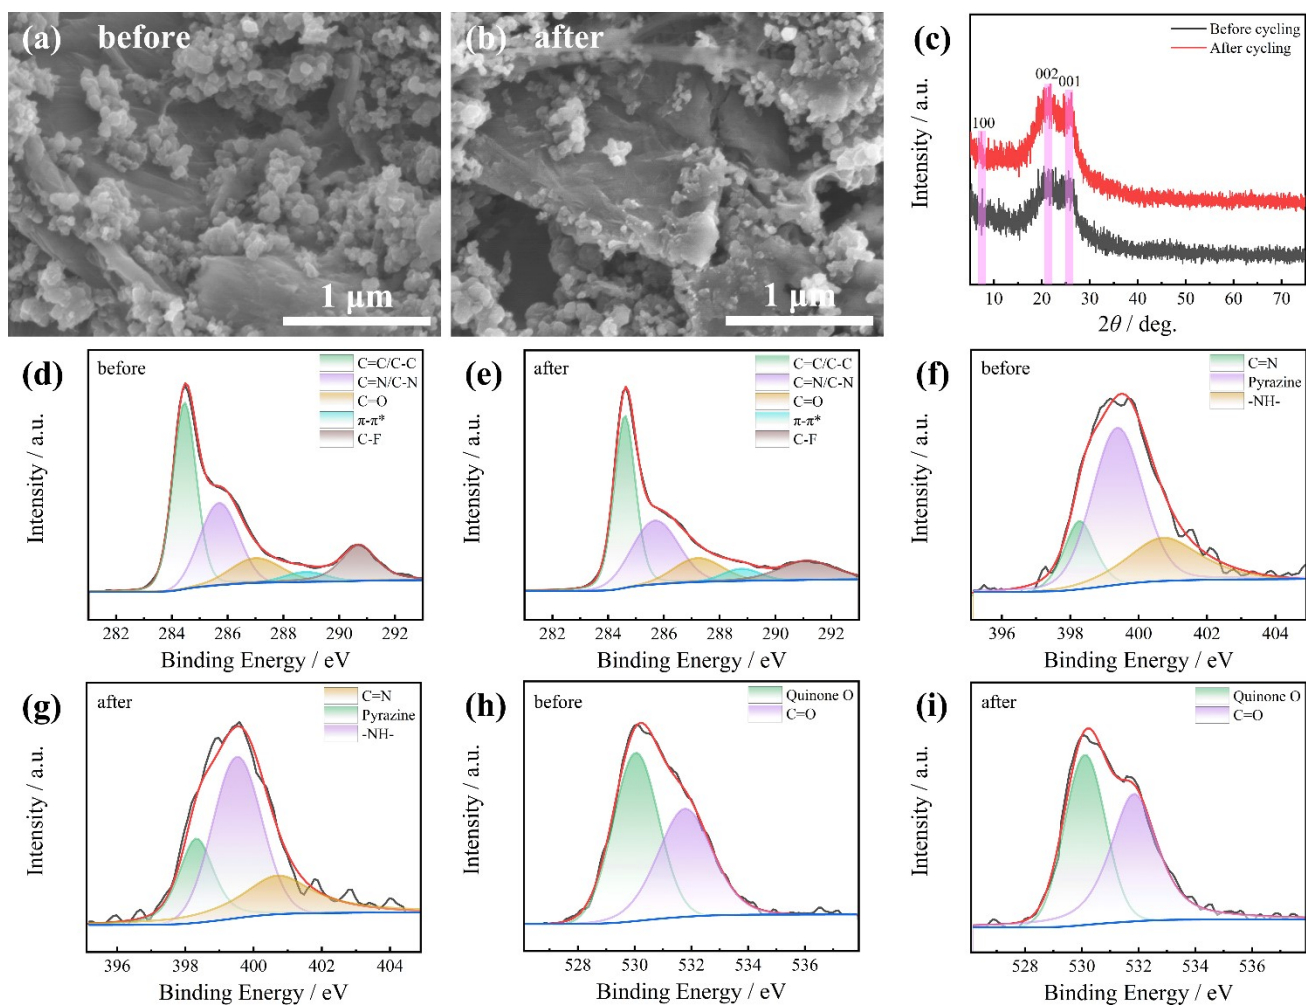

**Fig. S11.** (a, b) SEM images, (c) XRD patterns, and high-resolution (d, e) C1s, (f, g) N 1s, and (h, i) O 1s XPS spectra of BAHCGO-75 electrode before and after desalination/regeneration performance test.

**Table S1.** Comparison of desalination performances of TFPDQGO-75 with carbon-based CDI reported in the literature.

| <b>Material</b>                                            | <b>SAC / mg g<sup>-1</sup></b> | <b>MSAR / mg g<sup>-1</sup> min<sup>-1</sup></b> | <b>Ref.</b> |
|------------------------------------------------------------|--------------------------------|--------------------------------------------------|-------------|
| BAHC-COF                                                   | 30.7                           | 1.68                                             | This work   |
| BAHCGO-75                                                  | 50.5                           | 5.40                                             | This work   |
| 3D graphene-supported N-doped hierarchically porous carbon | 25.5                           | 0.64                                             | [8]         |
| Carbon foam                                                | 30.2                           | 3.75                                             | [9]         |
| Heteroatom-doped hierarchical porous carbon                | 16.19                          | 2.02                                             | [10]        |
| Defect-rich interconnected hierarchical porous carbon      | 31.25                          | 3.95                                             | [11]        |
| KC-pre-intercalated carbon nanosheets                      | 40.72                          | 2.04                                             | [12]        |
| 3D-printed thick carbon electrodes                         | 10.67                          | 0.28                                             | [13]        |
| N-doped polyporphyrin derived porous carbons               | 35.7                           | 4.67                                             | [14]        |
| AC                                                         | 8.1                            | 0.49                                             | [14]        |
| N-doped hierarchically porous carbon                       | 19.61                          | 2.38                                             | [15]        |
| Zeolitic-imidazolate framework (ZIF)-derived carbon        | 14.19                          | 3.99                                             | [6]         |
| Mg-MOF-74 derived carbon                                   | 16.82                          | 2.28                                             | [17]        |

## References

1. Y.L Shao, M.F. El-Kady, J.Y. Sun, Y.G. Li, Q.H. Zhang, M.F. Zhu, H.Z. Wang, B. Dunn, R.B. Kaner, *Chem. Rev.*, 2018, **118**, 9233-9280.
2. L.M. Xu, W.Q. Zhou, S.X. Chao, Y.M. Liang, X.Q. Zhao, C.C. Liu, J.K. Xu, *Adv. Energy Mater.*, 2022, **12**, 2200101.
3. F. Y. Meng, X. B. Tu, Y. Liu, K. Wang, X. T. Xu, X. J. Li, Z. W. Gong, T. Lu, L. K. Pan, *Sep. Purif. Technol.*, 2024, **329**, 125155.
4. L.M. Xu, Y. Liu, Z.B. Ding, X.T. Xu, X.J. Liu, Z.W. Gong, J.B. Li, T. Lu, L.K. Pan, *Small*, 2023, 2307843.
5. H.B. Li, T. Lu, L.K. Pan, Y.P. Zhang, Z. Sun, *J. Mater. Chem.* **2009**, *19*, 6773-6779.
6. X. B. Tu, Y. Liu, K. Wang, Z. B. Ding, X. T. Xu, T. Lu, L. K. Pan, *J. Colloid Interface Sci.*, 2023, **642**, 680-690.
7. L.M. Xu, Z.B. Ding, Y.Y. Chen, X.T. Xu, Y. Liu, J.B. Li, T. Lu, L.K. Pan, *J. Colloid Interface Sci.*, 2023, **630**, 372-381.
8. B. Feng, Z.U. Khan, W.U. Khan, *Environ. Sci.: Nano*, 2023, **10**, 1163.
9. C.P. Li, Y.Q. Wu, J.J. An, L.X. Gao, D.Q. Zhang, J. Li, Z.X. An, *Desalination*, 2023, **559**, 116656.
10. Z. Wang, M. Gao, J. Peng, L.W. Miao, W.Q. Chen, T.Q. Ao, *Int. J. Biol. Macromol.*, 2023, **241**, 124596.
11. X.Y. Gong, S.Z. Feng, L.X. Wang, D.Z. Jia, N.N. Guo, M.J. Xu, L.L. Ai, Q.T. Ma, Q. Zhang, Z.Y. Wang, *Desalination*, 2023, **564**, 116766.
12. Q. Liu, C.Y. Zhao, M.H. Yuan, L.P. Liu, X.H. Liu, Y.J. Liu, Z.Q. Liu, L. Tong, A.G. Ying, *Desalination*, 2022, **535**, 115842.
13. M.X. Shi, K.R. Lu, H.J. Jia, X.Y. Hong, Y.H. Yan, H. Qiang, F.Y. Wang, M.Z. Xia, *Sci. Total Environ.*, 2023, **904**, 167339.
14. W. Zhang, C. Jin, Z.Y. Shi, L. Zhu, L. Chen, Y.L. Liu, H. Zhang, *Chemosphere*, 2022, **291**, 133113.
15. S.J. Wang, D.Z. Chen, Z.X. Zhang, Y. Hu, H.Y. Quan, *Sep. Purif. Technol.*, 2022, **290**, 120912.
16. H. Wang, L. Edano, L. Valentino, Y.J. Lin, V.M. Palakkal, D.L. Hu, B.H. Chen, D.J. Liu, *Nano Energy*, 2020, **77**, 105304.
17. C.P. Li, Y.Q. Wu, F.Y. Zhang, L.X. Gao, D.Q. Zhang, Z.X. An, *Sep. Purif. Technol.*, 2021, **277**, 119618.
